# Supplementary material
Source: Springer Nature journal article supplement (https://www.springermedizin.de/resource/supplementary/12933_2009_226_MOESM2_ESM.pdf/9540022)
Supplement: MOESM2 [file 9540022]

# Proportion with Controlled BP by BMI (kg/m<sup>2</sup>)

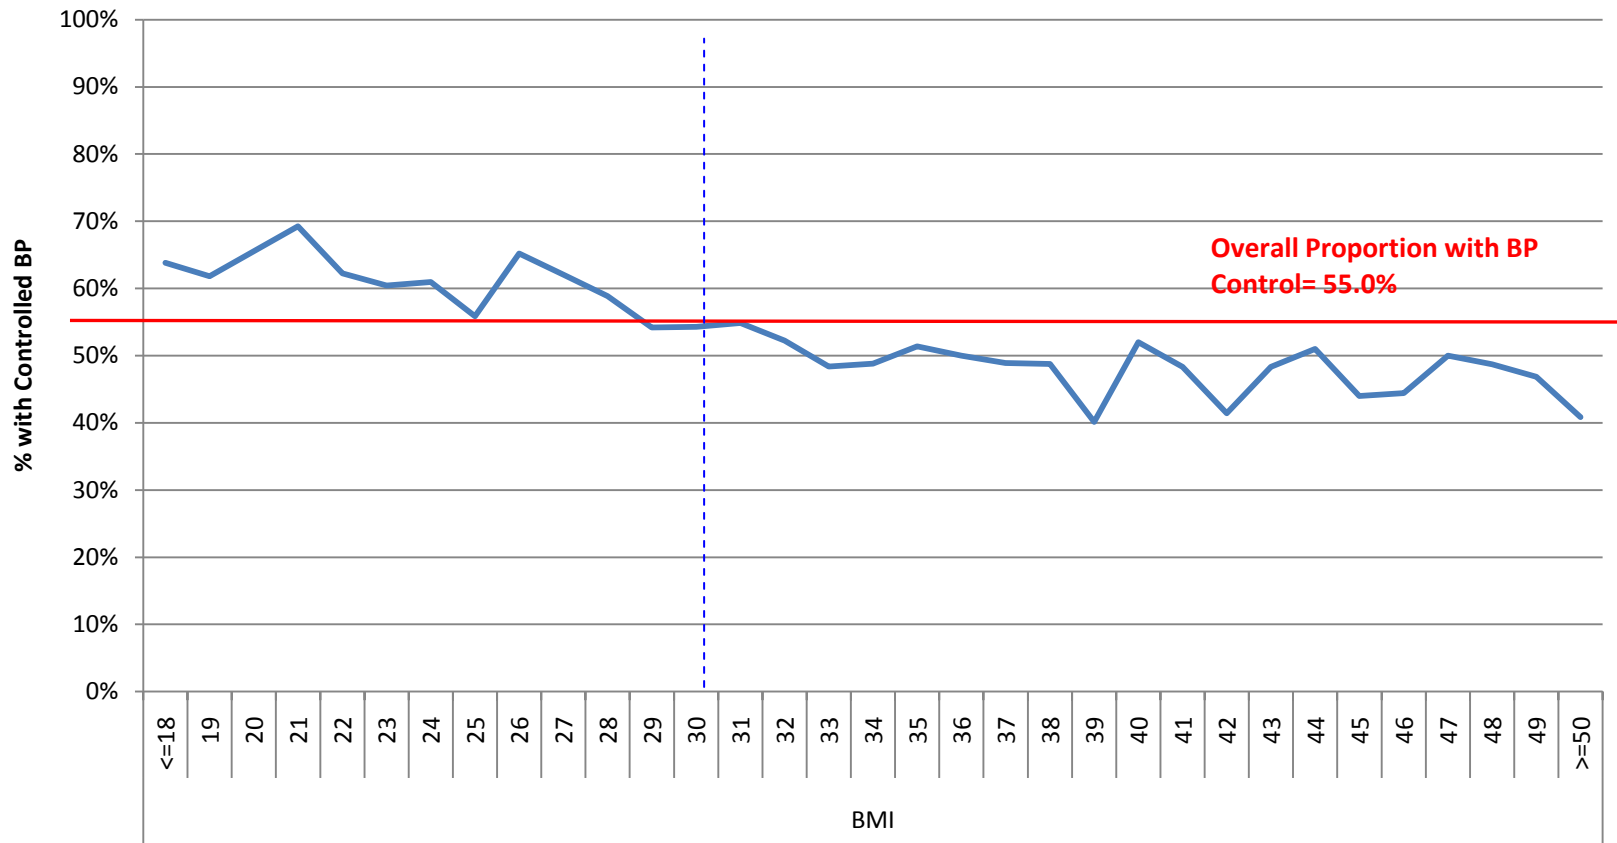

Overall Proportion with BP Control= 55.0%

\*BP control defined as <140/90 mmHg for non-diabetic patients, and <130/80 mmHg for diabetic patients.
